# Supplementary material for: Time course analyses of structural changes in the infrapatellar fat pad and synovial membrane during inflammation-induced persistent pain development in rat knee joint
Source: Springer Nature journal article supplement (doi:10.1186/s12891-018-2391-1), 2019-01-05

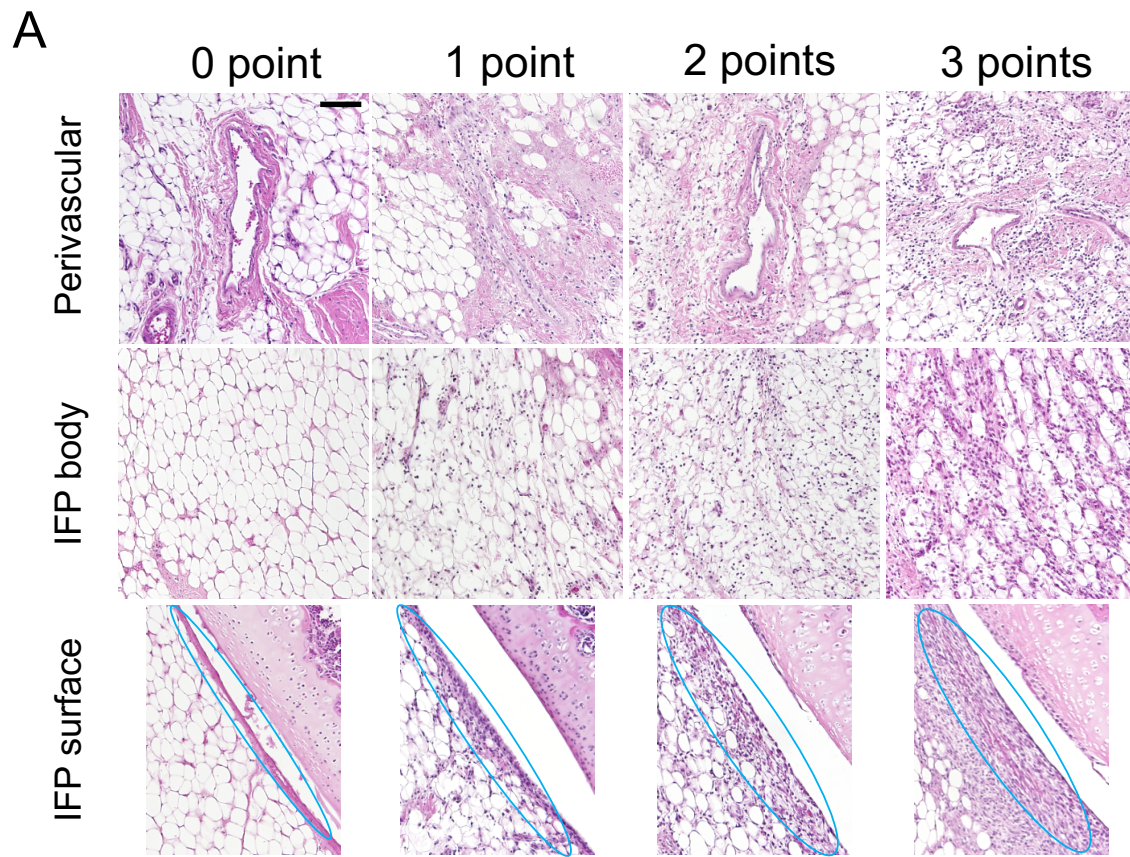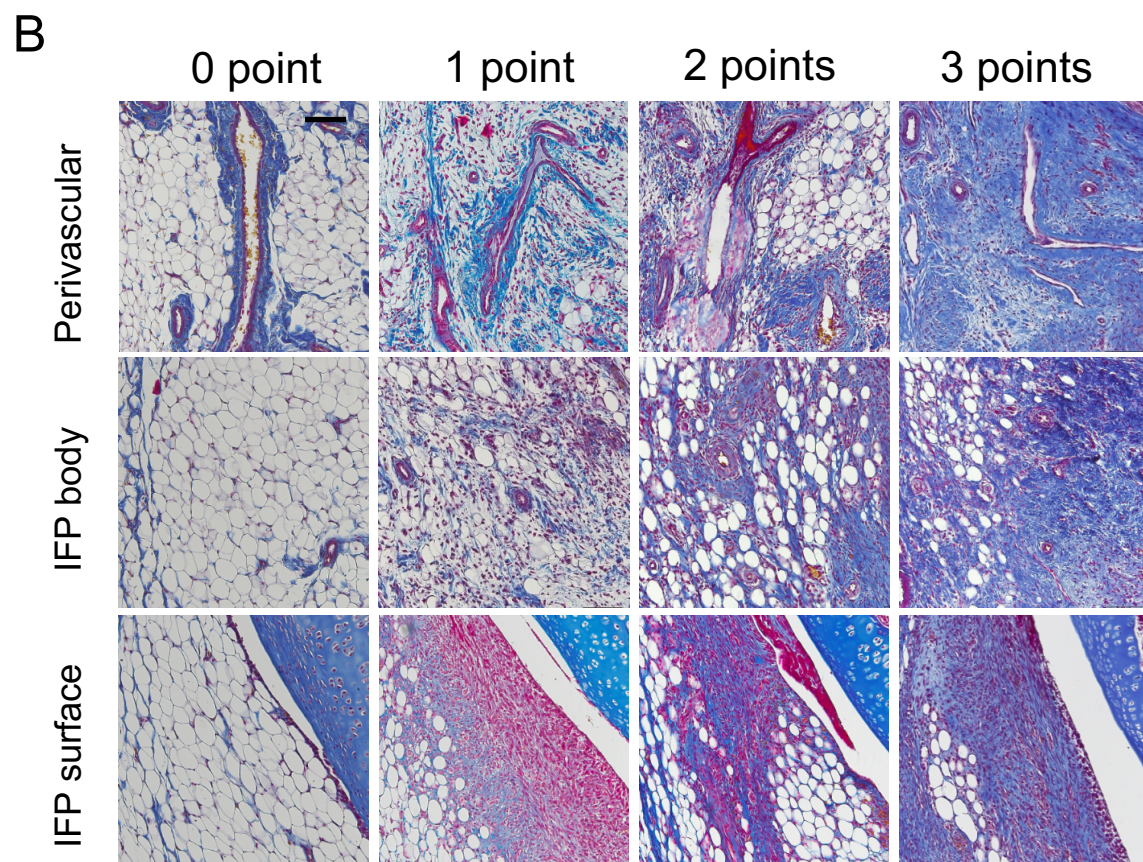

Supplement: MOESM1 [file 16379058]
